# Supplementary material for: Promotion of the second-order nonlinear optical effect by introducing ether linkage into polymer main chains
Source: Royal Society of Chemistry journal article supplement (doi:10.1039/d3py00243h), 2023-01-01
Supplement: d3py00243h1.pdf [file d3py00243h1.pdf]

## Electronic supplementary information (ESI)

### Promotion of Second-order Nonlinear Optical Effect by Introducing Ether Linkage into Polymer Main Chains

Kai Wang, Xiaocong Deng, Qianqian Li\* and Zhen Li\*<sup>a</sup>

Hubei Key Lab on Organic and Polymeric Opto-Electronic Materials, TaiKang Center for Life and Medical Sciences, Sauvage Center for Molecular Sciences, Department of Chemistry, Wuhan University, Wuhan 430072 (China). E-mail: liqianqian@whu.edu.cn, [lizhen@whu.edu.cn](mailto:lizhen@whu.edu.cn).

#### Additional data and analysis

**Table S1** The maximum absorption wavelength ( $\lambda_{\max}$ , nm) in different solvents (0.02 mg/mL).

|        | CHCl <sub>3</sub> | DCM | THF | DMF | DMSO | $\Delta$ |
|--------|-------------------|-----|-----|-----|------|----------|
| Mon-NN | 458               | 460 | 462 | 479 | 488  | 30       |
| P1     | 457               | 460 | 463 | 478 | 485  | 28       |
| P2     | 457               | 459 | 463 | 478 | 486  | 29       |
| P3     | 457               | 458 | 463 | 477 | 485  | 28       |
| P4     | 458               | 460 | 467 | 479 | 486  | 28       |
| P5     | 456               | 458 | 462 | 477 | 484  | 28       |

$\Delta = \lambda_{\max}(\text{DMSO}) - \lambda_{\max}(\text{CHCl}_3)$

Dielectric constant of solvents:  $\epsilon(\text{CHCl}_3) = 4.8 \text{ C}^2/(\text{N}\cdot\text{M}^2)$ ,  $\epsilon(\text{THF}) = 7.5 \text{ C}^2/(\text{N}\cdot\text{M}^2)$ ,  
 $\epsilon(\text{CH}_2\text{Cl}_2) = 8.9 \text{ C}^2/(\text{N}\cdot\text{M}^2)$ ,  $\epsilon(\text{DMF}) = 37.6 \text{ C}^2/(\text{N}\cdot\text{M}^2)$ ,  $\epsilon(\text{DMSO}) = 46.7 \text{ C}^2/(\text{N}\cdot\text{M}^2)$

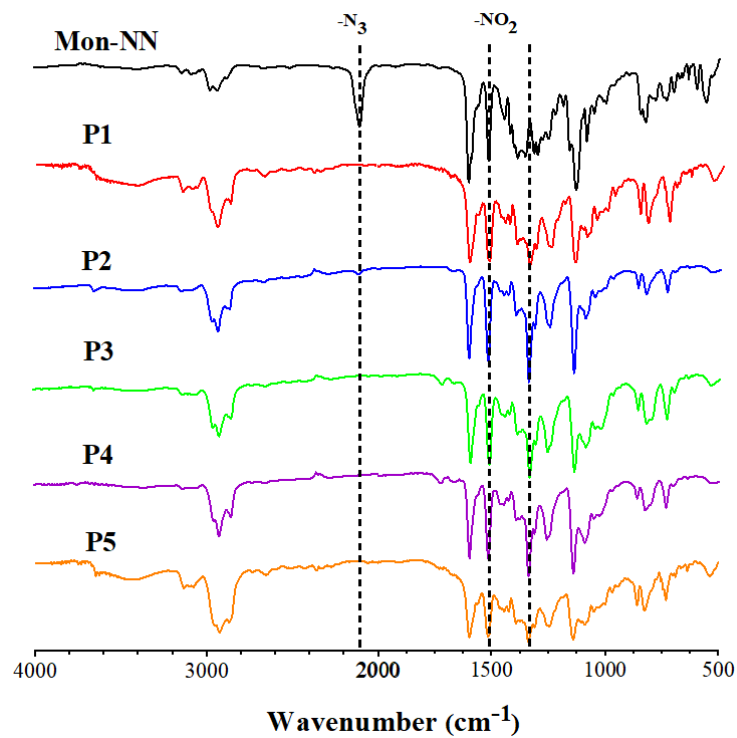

**Fig. S1** FT-IR spectra of polymers.

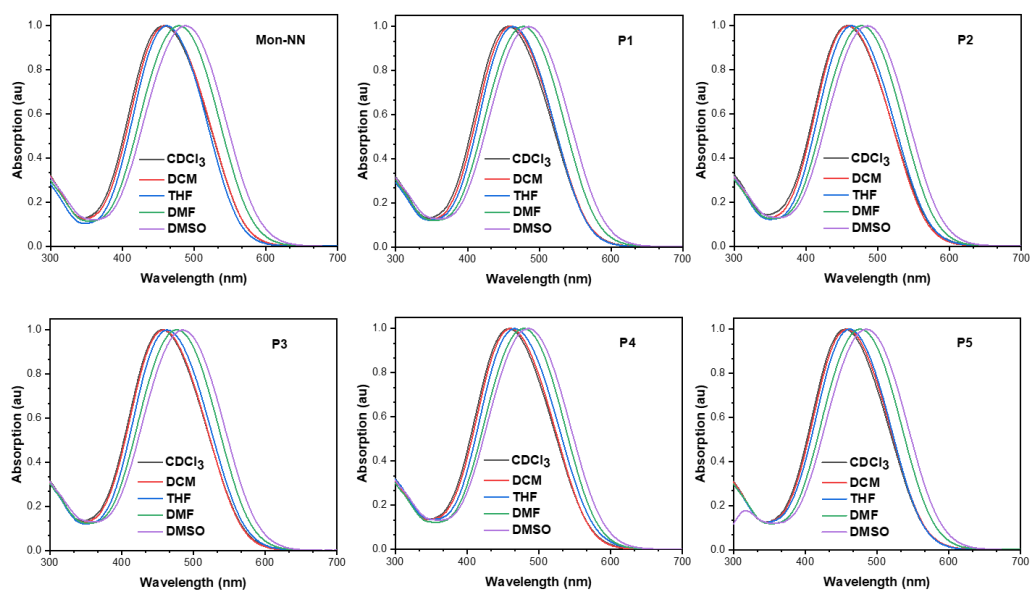

**Fig. S2** UV-vis spectra of polymers and Mon-NN in different solvents ( $\text{CHCl}_3$ , DCM, THF, DMF, DMSO, concentration:  $0.02 \text{ mg mL}^{-1}$ ).

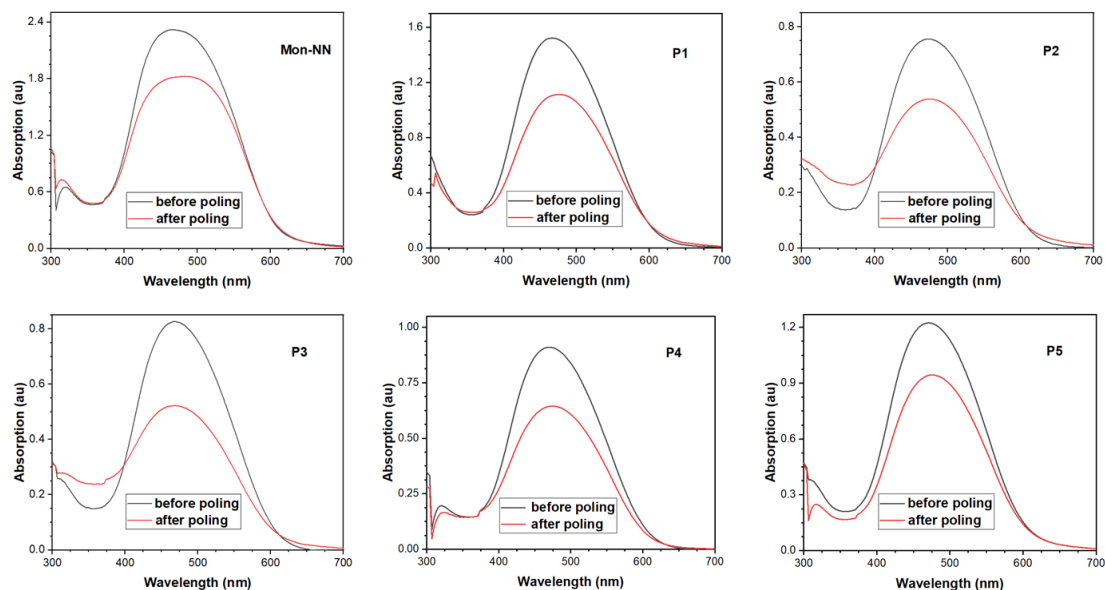

Fig. S3 UV-vis absorption spectra of polymer films and monomer **Mon-NN** before and after poling.

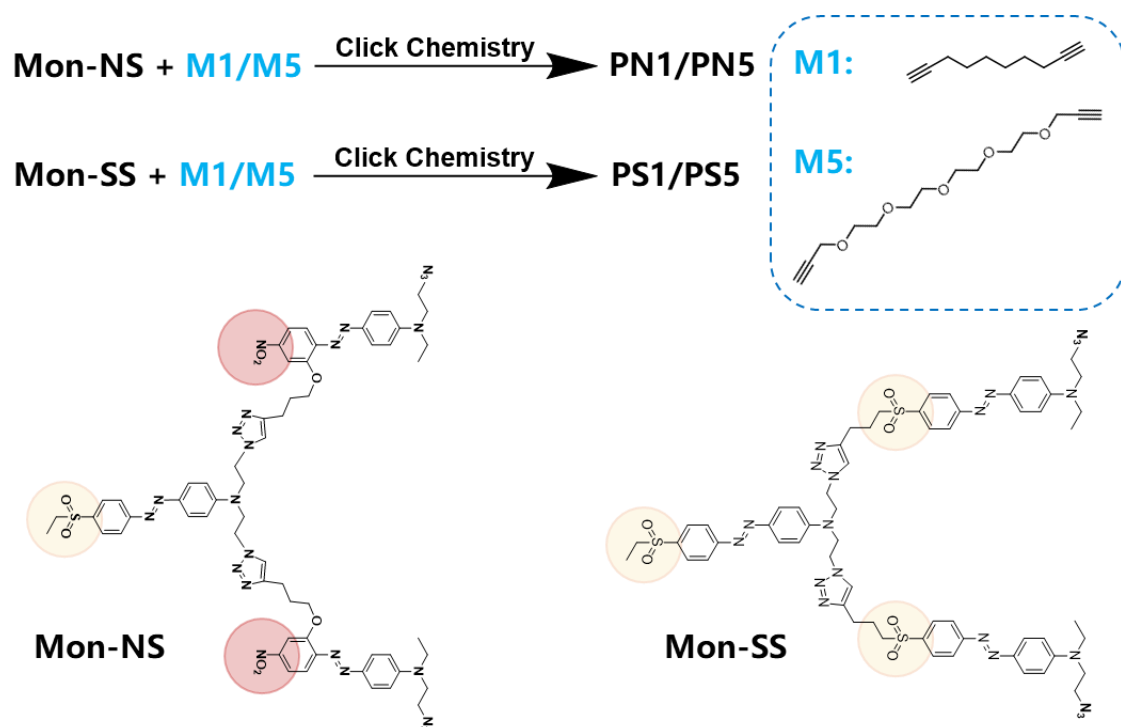

Fig. S4 Synthesis of polymer **PN1**, **PN5**, **PS1** and **PS5** and molecular structures of monomers.

### General synthesis of **PN1**, **PN5**, **PS1** and **PS5**

Two monomers (at a molar ratio of 1 : 1) were dissolved in DMF (the concentrate of all monomers was about 15 mg/mL) in a Schlenk flask under nitrogen. A certain volume of  $\text{CuSO}_4$  aqueous solution (0.08 mol/L) and ascorbic acid sodium aqueous solution (NaAsc, 0.16 mol/L) were added into the

mixture. After the reaction was stirred for 24 h, another batch of CuSO<sub>4</sub> and NaAsc aqueous solution was added. The mixture was then stirred for another 12 h, and another batch of CuSO<sub>4</sub> and NaAsc aqueous solution was added. After another 12 h, the mixture was poured into water. The precipitate was collected and washed by deionized water and anhydrous methanol in turn. The obtained solid was further purified by reprecipitation from its DCM solution into methanol.

**PN1: Mon-NS** (139.4 mg, 0.110 mmol), **M1** (14.8 mg, 0.110 mmol), CuSO<sub>4</sub> (250 + 150 + 150 μL), NaAsc (250 + 150 + 150 μL) in DMF (10 mL), a red powder (80.0 mg, 51.9%).  $M_w = 60500$ ,  $M_w/M_n = 1.87$  (GPC, PMMA calibration). IR (thin film),  $\nu$  (cm<sup>-1</sup>): 1516, 1338 (-NO<sub>2</sub>), 1138 (-SO<sub>2</sub>-). <sup>1</sup>H NMR (400 MHz, CDCl<sub>3</sub>, 298 K),  $\delta$  (ppm): 7.92-7.86 (ArH), 7.77 (ArH), 7.72 (ArH), 7.57 (ArH), 7.34 (ArH), 7.21 (ArH), 6.97 (ArH), 6.63 (ArH), 4.52 (-CH<sub>2</sub>-), 4.40 (-CH<sub>2</sub>-), 4.11 (-CH<sub>2</sub>-), 3.87 (-CH<sub>2</sub>-), 3.74 (-CH<sub>2</sub>-), 3.27 (-CH<sub>2</sub>-), 3.13 (-CH<sub>2</sub>-), 2.92 (-CH<sub>2</sub>-), 2.56 (-CH<sub>2</sub>-), 2.27 (-CH<sub>2</sub>-), 2.19 (-CH<sub>2</sub>-), 1.75 (-CH<sub>2</sub>-), 1.43 (-CH<sub>2</sub>-), 1.26 (-CH<sub>2</sub>-), 1.10 (-CH<sub>2</sub>-), 0.88 (-CH<sub>3</sub>). <sup>13</sup>C NMR (100 MHz, CDCl<sub>3</sub>, 298 K),  $\delta$  (ppm): 155.78, 155.11, 150.41, 129.24, 126.26, 125.94, 125.54, 122.90, 117.38, 116.61, 111.37, 109.24, 68.62, 50.72, 47.59, 34.30, 30.33, 29.72, 29.34, 21.72, 12.14, 7.47.

**PN5: Mon-NS** (142.3 mg, 0.112 mmol), **M5** (30.2 mg, 0.112 mmol), CuSO<sub>4</sub> (210 + 100 + 100 μL), NaAsc (210 + 100 + 100 μL), in DMF (9 mL), a red powder (79.0 mg, 45.8%).  $M_w = 17500$ ,  $M_w/M_n = 1.87$  (GPC, PMMA calibration). IR (thin film),  $\nu$  (cm<sup>-1</sup>): 1516, 1338 (-NO<sub>2</sub>), 1142 (-SO<sub>2</sub>-). <sup>1</sup>H NMR (400 MHz, CDCl<sub>3</sub>, 298 K),  $\delta$  (ppm): 7.86 (ArH), 7.77-7.74 (ArH), 7.57 (ArH), 7.33 (ArH), 6.65 (ArH), 6.58 (ArH), 4.58 (-CH<sub>2</sub>-), 4.40 (-CH<sub>2</sub>-), 4.11 (-CH<sub>2</sub>-), 3.88 (-CH<sub>2</sub>-), 3.74 (-CH<sub>2</sub>-), 3.54 (-CH<sub>2</sub>-), 3.28 (-CH<sub>2</sub>-), 3.11 (-CH<sub>2</sub>-), 2.92 (-CH<sub>2</sub>-), 2.19 (-CH<sub>2</sub>-), 1.24 (-CH<sub>2</sub>-), 1.09 (-CH<sub>3</sub>). <sup>13</sup>C NMR (100 MHz, CDCl<sub>3</sub>, 298 K),  $\delta$  (ppm): 155.80, 155.11, 150.36, 148.20, 146.81, 144.66, 129.23, 126.28, 125.96, 122.91, 117.36, 116.51, 111.73, 111.44, 109.26, 70.46, 69.56, 68.62, 64.43, 51.17, 50.71, 50.40, 47.65, 47.26, 45.70, 28.51, 21.87, 12.15, 7.47.

**PS1: Mon-SS** (144.6 mg, 0.113 mmol), **M1** (15.2 mg, 0.113 mmol), CuSO<sub>4</sub> (250 + 150 + 150 μL), NaAsc (250 + 150 + 150 μL) in DMF (10 mL), a yellow powder (102.0 mg, 63.8%).  $M_w = 88800$ ,  $M_w/M_n = 1.78$  (GPC, PMMA calibration). IR (thin film),  $\nu$  (cm<sup>-1</sup>): 1132 (-SO<sub>2</sub>-). <sup>1</sup>H NMR (400 MHz, CDCl<sub>3</sub>, 298 K),  $\delta$  (ppm): 7.94 (ArH), 7.89 (ArH), 7.17 (ArH), 6.65-6.63 (ArH), 4.54 (-CH<sub>2</sub>-), 4.42 (-CH<sub>2</sub>-), 3.91 (-CH<sub>2</sub>-), 3.72 (-CH<sub>2</sub>-), 3.29 (-CH<sub>2</sub>-), 3.13 (-CH<sub>2</sub>-), 2.78 (-CH<sub>2</sub>-), 2.57 (-CH<sub>2</sub>-), 2.05 (-CH<sub>2</sub>-), 1.72 (-CH<sub>2</sub>-), 1.51 (-CH<sub>2</sub>-), 1.25 (-CH<sub>2</sub>-), 1.11 (-CH<sub>3</sub>). <sup>13</sup>C NMR (100 MHz, CDCl<sub>3</sub>, 298 K),  $\delta$  (ppm):

150.50, 148.47, 146.29, 138.42, 129.30, 129.06, 126.17, 123.00, 122.86, 121.93, 111.39, 55.22, 50.74, 50.36, 29.72, 29.33, 28.74, 25.39, 23.78, 22.66, 12.14, 7.49.

**PS5: Mon-SS** (148.1 mg, 0.116 mmol), **M5** (31.3 mg, 0.116 mmol), CuSO<sub>4</sub> (210 + 100 + 100 μL), NaAsc (210 + 100 + 100 μL) in DMF (10 mL), a yellow powder (60.0 mg, 33.4%).  $M_w = 28100$ ,  $M_w/M_n = 1.86$  (GPC, PMMA calibration). IR (thin film),  $\nu$  (cm<sup>-1</sup>): 1132 (-SO<sub>2</sub>-). <sup>1</sup>H NMR (400 MHz, CDCl<sub>3</sub>, 298 K),  $\delta$ (ppm): 7.91 (ArH), 7.84 (ArH), 7.56 (ArH), 6.69 (ArH), 4.63 (-CH<sub>2</sub>-), 4.57 (-CH<sub>2</sub>-), 4.44 (-CH<sub>2</sub>-), 3.91 (-CH<sub>2</sub>-), 3.73 (-CH<sub>2</sub>-), 3.58 (-CH<sub>2</sub>-), 3.28 (-CH<sub>2</sub>-), 3.15 (-CH<sub>2</sub>-), 2.79 (-CH<sub>2</sub>-), 2.07 (-CH<sub>2</sub>-), 1.78 (-CH<sub>2</sub>-), 1.25 (-CH<sub>2</sub>-), 1.12 (-CH<sub>3</sub>). <sup>13</sup>C NMR (100 MHz, CDCl<sub>3</sub>, 298 K),  $\delta$ (ppm): 156.17, 155.60, 150.54, 138.48, 129.30, 129.07, 126.17, 123.01, 122.88, 111.97, 111.46, 70.50, 69.60, 64.52, 55.21, 50.74, 50.38, 47.62, 47.27, 45.76, 23.79, 22.65, 12.15, 7.50.

**Table S2** Characterization data and NLO properties of polymers

|     | Yield (%) | $M_w^a$ (10 <sup>4</sup> ) | $M_w/M_n^a$ (PDI) | $T_g^b$ (°C) | $T_d^c$ (°C) | $T_e^d$ (°C) | $l_s^e$ (nm) | $\lambda_{\max}^f$ (nm) | $d_{33}^g$ (pm/V) | $d_{33(\infty)}^h$ (pm/V) | $\Phi^i$ | $N^j$ (%) |
|-----|-----------|----------------------------|-------------------|--------------|--------------|--------------|--------------|-------------------------|-------------------|---------------------------|----------|-----------|
| PN1 | 51.9      | 6.05                       | 1.87              | 111          | 278          | 161          | 412          | 461                     | 50                | 10                        | 0.11     | 69.1      |
| PN5 | 45.8      | 1.75                       | 1.87              | 92           | 270          | 115          | 287          | 463                     | 84                | 17                        | 0.20     | 62.2      |
| PS1 | 63.8      | 8.88                       | 1.78              | 109          | 302          | 144          | 228          | 433                     | 60                | 17                        | 0.14     | 75.8      |
| PS5 | 33.4      | 2.81                       | 1.86              | 95           | 262          | 128          | 292          | 442                     | 66                | 17                        | 0.16     | 68.2      |

<sup>a</sup> Determined by GPC in DMF, based on calibration with PMMA. <sup>b</sup> Glass transition temperature ( $T_g$ ) detected by the DSC analyses under nitrogen at a heating rate of 10 °C min<sup>-1</sup>. <sup>c</sup> The 5 % weight loss temperature of polymers detected by the TGA under nitrogen at a heating rate of 10 °C min<sup>-1</sup>. <sup>d</sup> The best poling temperature. <sup>e</sup> Film thickness. <sup>f</sup> The maximum absorption wavelength of thin films. <sup>g</sup> Second harmonic generation (SHG) coefficient measured at 1064 nm fundamental beam at a voltage of 7.0 kV. <sup>h</sup> The non-resonant  $d_{33}$  values calculated using the approximate two-level model. <sup>i</sup> Order parameter  $\Phi = 1 - A_1/A_0$ ,  $A_1$  and  $A_0$  are the absorbance values of the polymer film after and before corona poling, respectively. <sup>j</sup> The loading density of the effective chromophores.

**P6-P9:**  
**Ref. 1**  
 "□" in Fig. 4

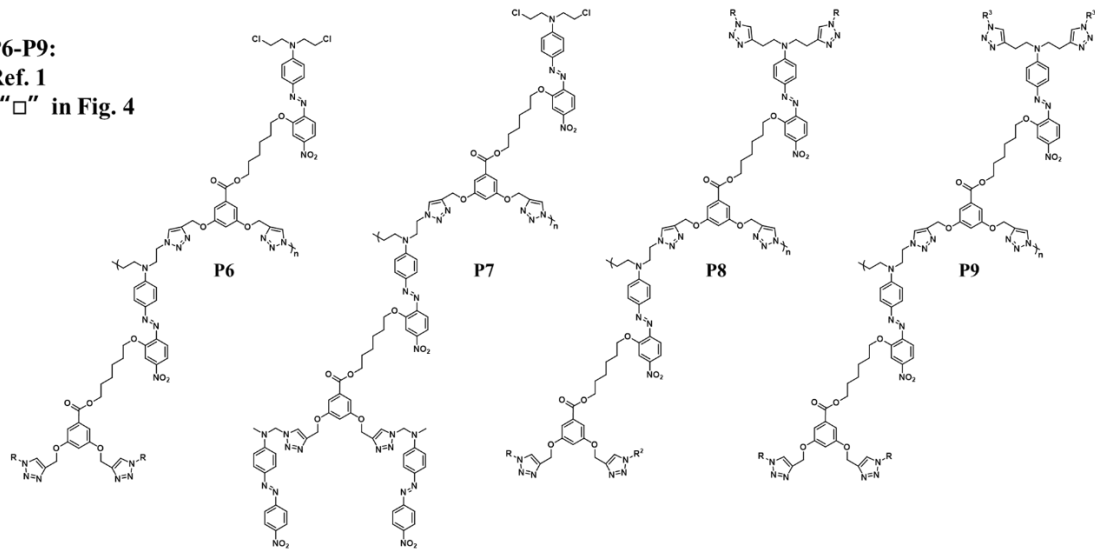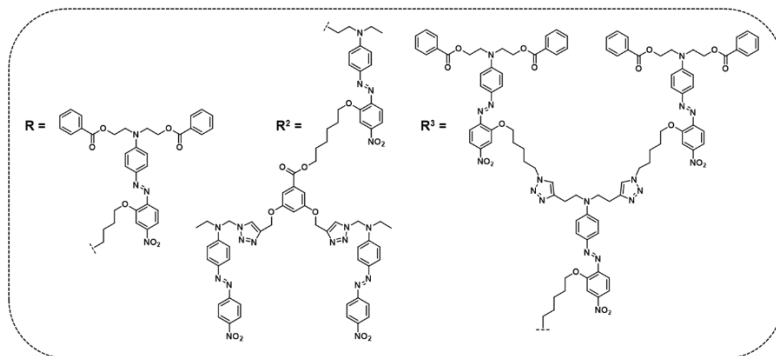

| No.       | $d_{33}$<br>(pm/V) | $\Phi$ |
|-----------|--------------------|--------|
| <b>P6</b> | 172                | 0.25   |
| <b>P7</b> | 189                | 0.24   |
| <b>P8</b> | 232                | 0.23   |
| <b>P9</b> | 227                | 0.26   |

**P10-P14:**  
**Ref. 2**  
 "○" in Fig. 4

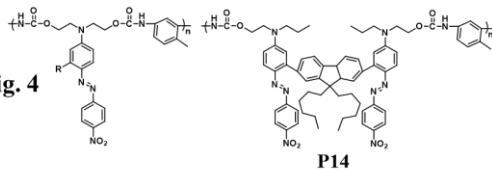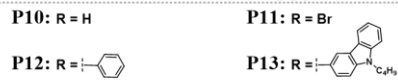

| No.                | P10  | P11  | P12  | P13  | P14  |
|--------------------|------|------|------|------|------|
| $d_{33}$<br>(pm/V) | 56   | 52   | 49   | 82   | 56   |
| $\Phi$             | 0.15 | 0.18 | 0.20 | 0.34 | 0.31 |

**P15-P19:**  
**Ref. 3**  
 "△" in Fig. 4

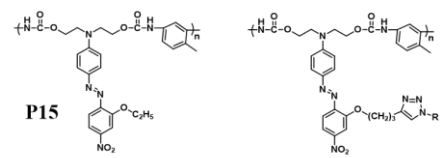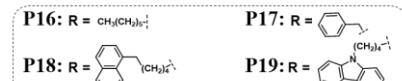

| No.                | P15  | P16  | P17  | P18  | P19  |
|--------------------|------|------|------|------|------|
| $d_{33}$<br>(pm/V) | 54   | 69   | 75   | 56   | 45   |
| $\Phi$             | 0.08 | 0.14 | 0.22 | 0.20 | 0.17 |

**P20-P22:**  
Ref. 4

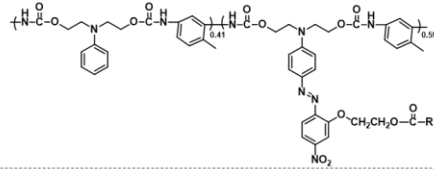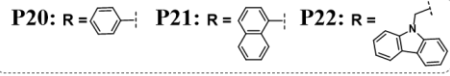

| No.                | P20 | P21 | P22 |
|--------------------|-----|-----|-----|
| $d_{33}$<br>(pm/V) | 35  | 40  | 58  |
| $\Phi$             | -   | -   | -   |

**P23-P25:**  
Ref. 5  
"▽" in Fig. 4

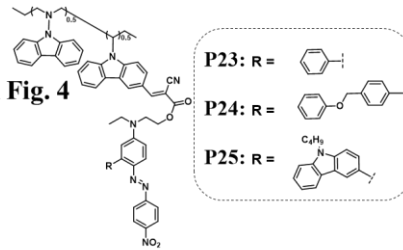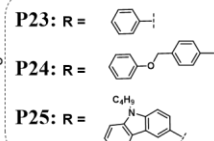

| No.                | P23  | P25  | P25  |
|--------------------|------|------|------|
| $d_{33}$<br>(pm/V) | 29   | 40   | 34   |
| $\Phi$             | 0.11 | 0.19 | 0.17 |

**P26-P33:**  
Ref. 6  
"◇" in Fig. 4

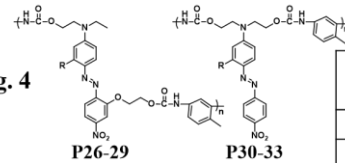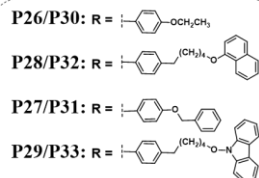

| No. | $d_{33}$<br>(pm/V) | $\Phi$ |
|-----|--------------------|--------|
| P26 | 65                 | 0.16   |
| P27 | 106                | 0.24   |
| P28 | 74                 | 0.16   |
| P29 | 67                 | 0.14   |
| P30 | 60                 | 0.15   |
| P31 | 84                 | 0.22   |
| P32 | 58                 | 0.20   |
| P33 | 64                 | 0.18   |

**P34-P39:**  
Ref. 7  
"◁" in Fig. 4

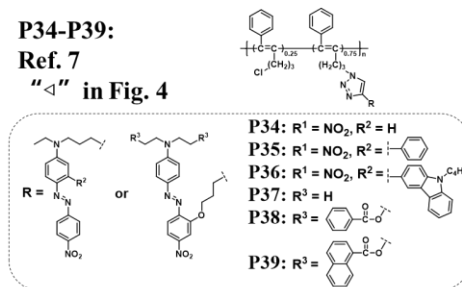

| No. | $d_{33}$<br>(pm/V) | $\Phi$ |
|-----|--------------------|--------|
| P34 | 72                 | 0.14   |
| P35 | 131                | 0.19   |
| P36 | 53                 | 0.15   |
| P37 | 63                 | 0.12   |
| P38 | 34                 | 0.10   |
| P39 | 25                 | 0.09   |

**P40:**  
Ref. 8

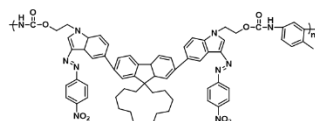

| No. | $d_{33}$<br>(pm/V) | $\Phi$ |
|-----|--------------------|--------|
| P34 | 43                 | -      |

**P41-P43:**  
Ref. 9  
"▷" in Fig. 4

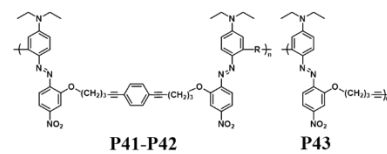

| No. | $d_{33}$<br>(pm/V) | $\Phi$ |
|-----|--------------------|--------|
| P41 | 88                 | 0.15   |
| P42 | 90                 | 0.18   |
| P43 | 13                 | 0.02   |

**P44-P47:**  
Ref. 10

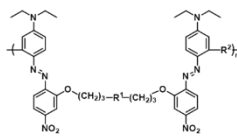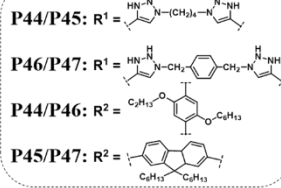

| No.                | P44 | P45 | P46 | P47 |
|--------------------|-----|-----|-----|-----|
| $d_{33}$<br>(pm/V) | 75  | 64  | 65  | 95  |
| $\Phi$             | -   | -   | -   | -   |

**P48-P51:**  
Ref. 11

"○" in Fig. 4

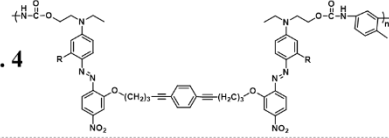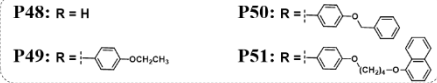

| No.                | P48  | P49  | P50  | P51  |
|--------------------|------|------|------|------|
| $d_{33}$<br>(pm/V) | 119  | 128  | 108  | 84   |
| $\Phi$             | 0.20 | 0.26 | 0.22 | 0.14 |

**P52-P55:**  
Ref. 12

"Δ" in Fig. 4

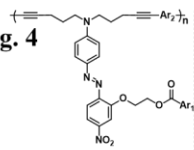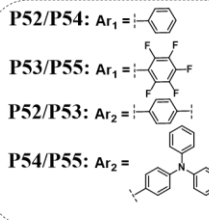

| No.                | P52  | P53  | P54  | P55  |
|--------------------|------|------|------|------|
| $d_{33}$<br>(pm/V) | 12   | 129  | 50   | 167  |
| $\Phi$             | 0.08 | 0.15 | 0.11 | 0.24 |

**P56-P59:**  
Ref. 13

"Δ" in Fig. 4

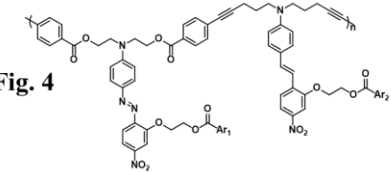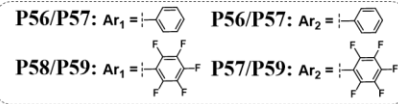

| No.                | P56  | P57  | P58  | P59  |
|--------------------|------|------|------|------|
| $d_{33}$<br>(pm/V) | 100  | 162  | 94   | 150  |
| $\Phi$             | 0.21 | 0.33 | 0.15 | 0.29 |

**P60-P61:**  
Ref. 14

"Δ" in Fig. 4

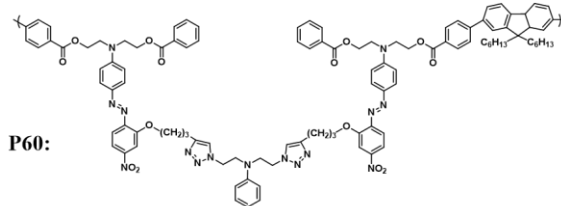

| No.                | P60  | P61  |
|--------------------|------|------|
| $d_{33}$<br>(pm/V) | 99   | 116  |
| $\Phi$             | 0.15 | 0.23 |

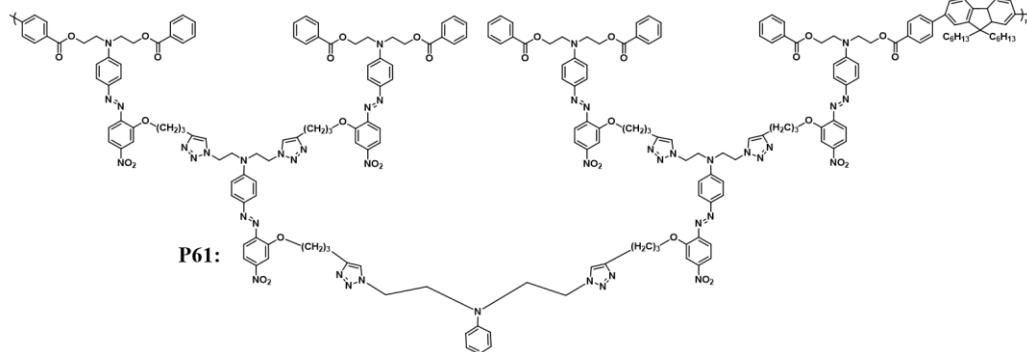



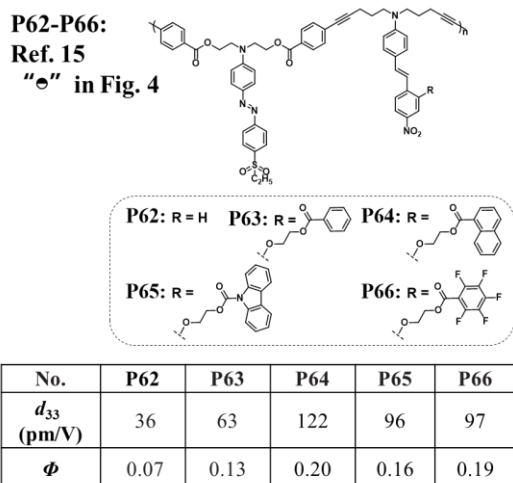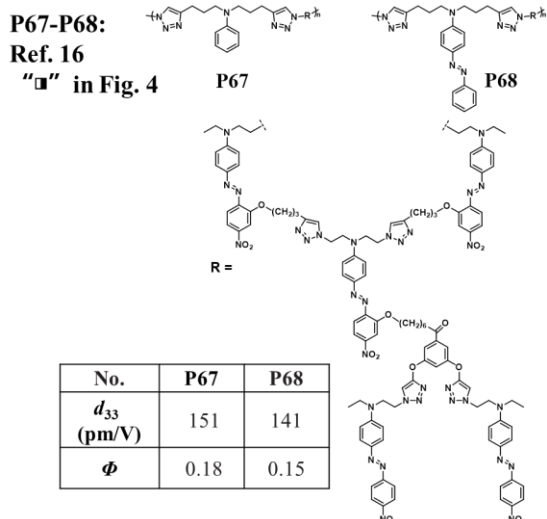

**Fig. S5** Chemical structures and  $d_{33}$  values of linear polymers and L-D copolymers based on nitroazobenzene chromophore in previous study.

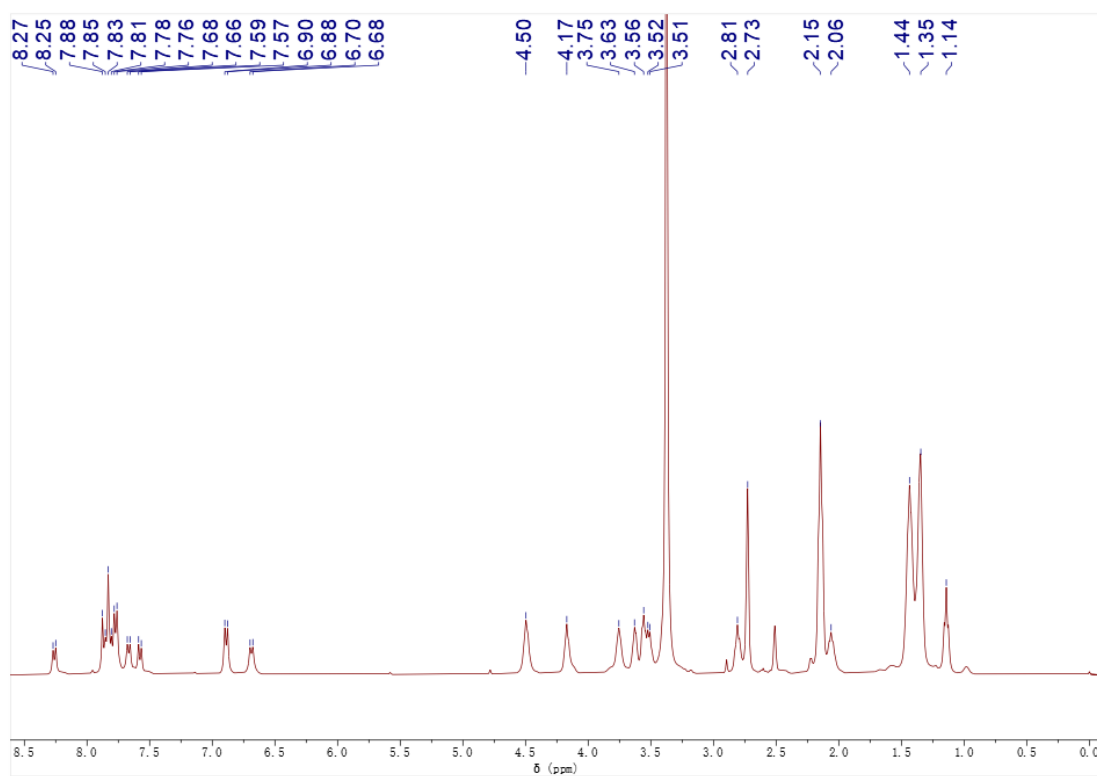

**Fig. S6** The  $^1\text{H}$  NMR spectrum of **P1** in  $\text{DMSO-}d_6$ .

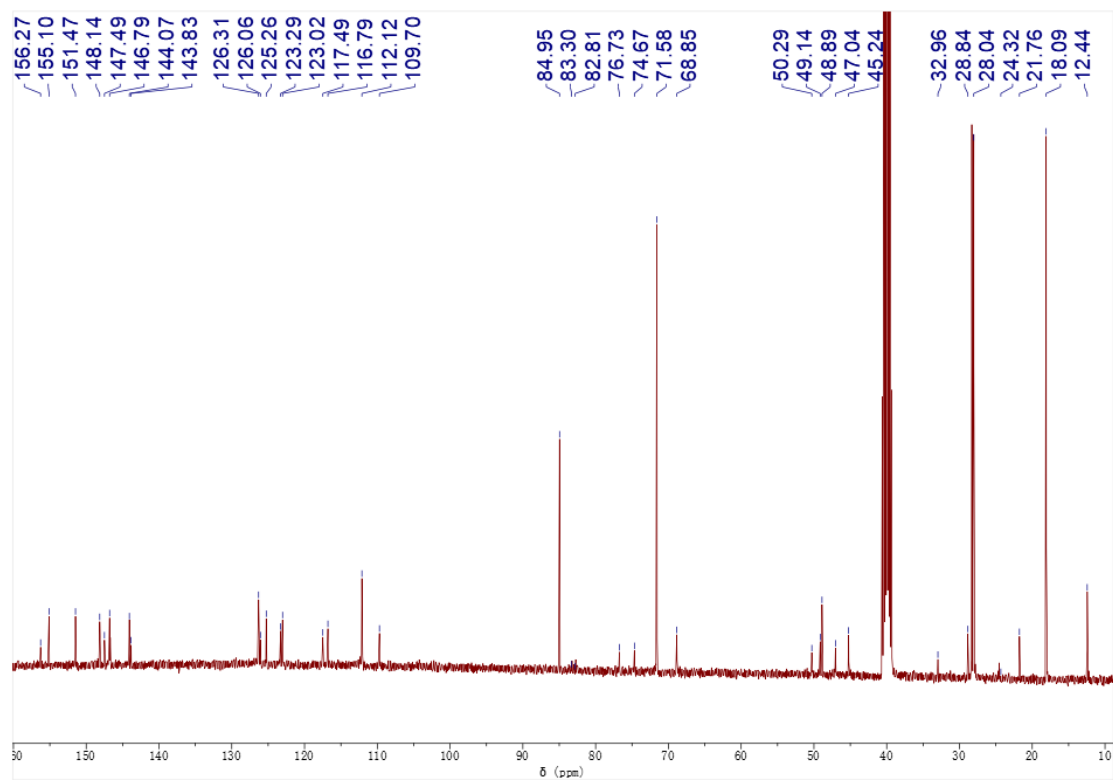

Fig. S7 The  $^{13}\text{C}$  NMR spectrum of P1 in  $\text{CDCl}_3$ .

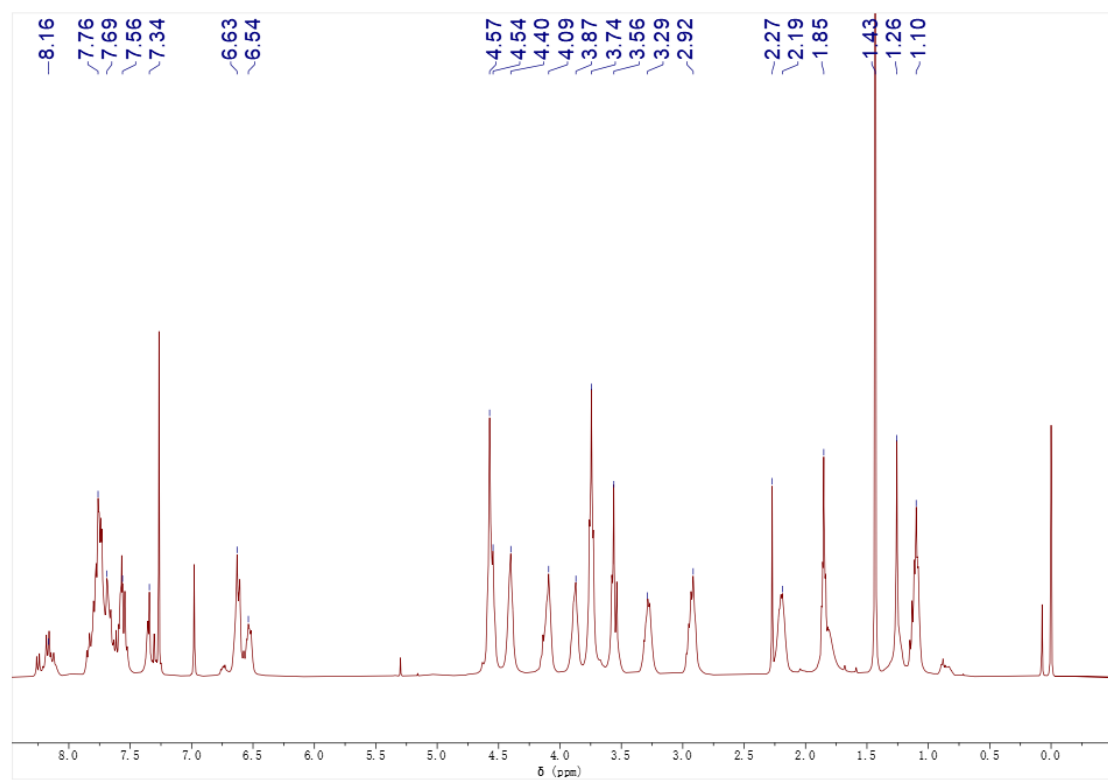

Fig. S8 The  $^1\text{H}$  NMR spectrum of P2 in  $\text{CDCl}_3$ .

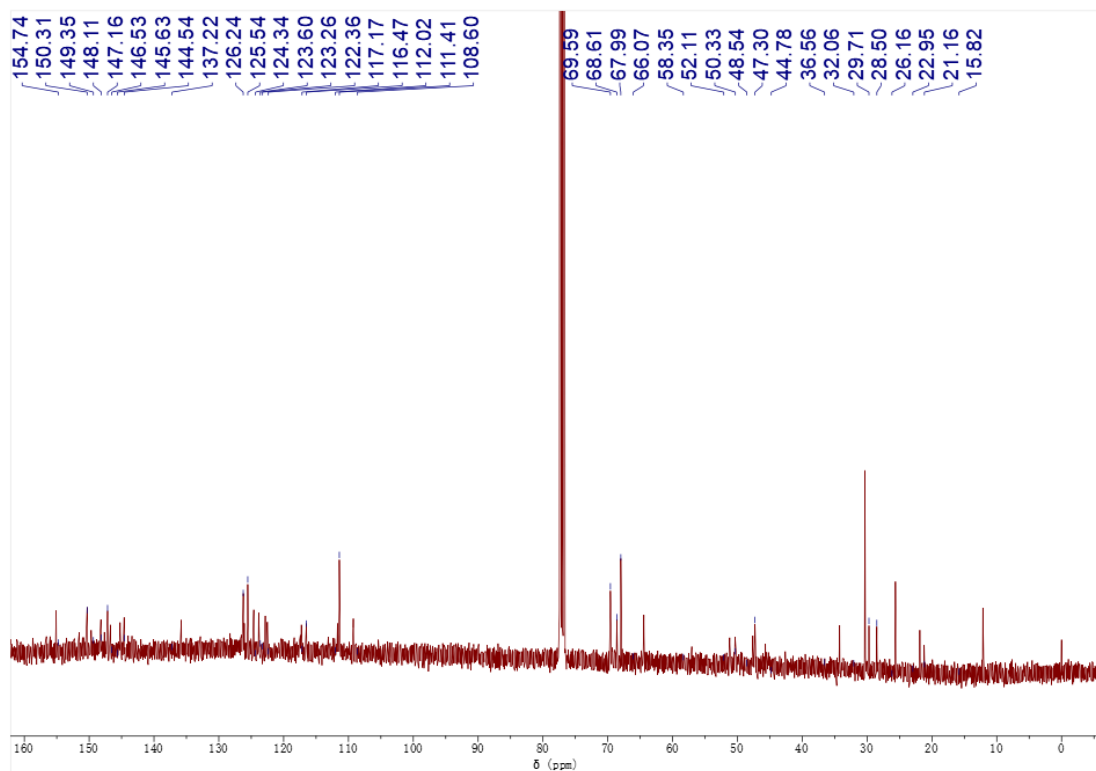

Fig. S9 The  $^{13}\text{C}$  NMR spectrum of P2 in  $\text{CDCl}_3$ .

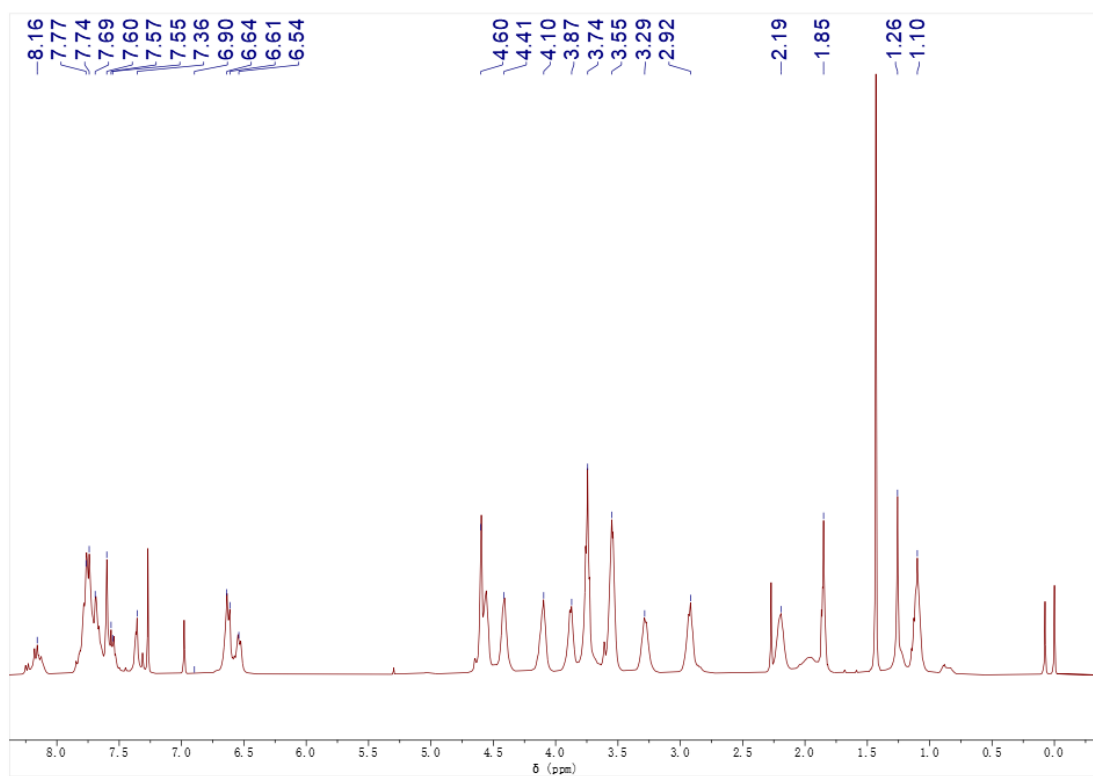

Fig. S10 The  $^1\text{H}$  NMR spectrum of P3 in  $\text{CDCl}_3$ .

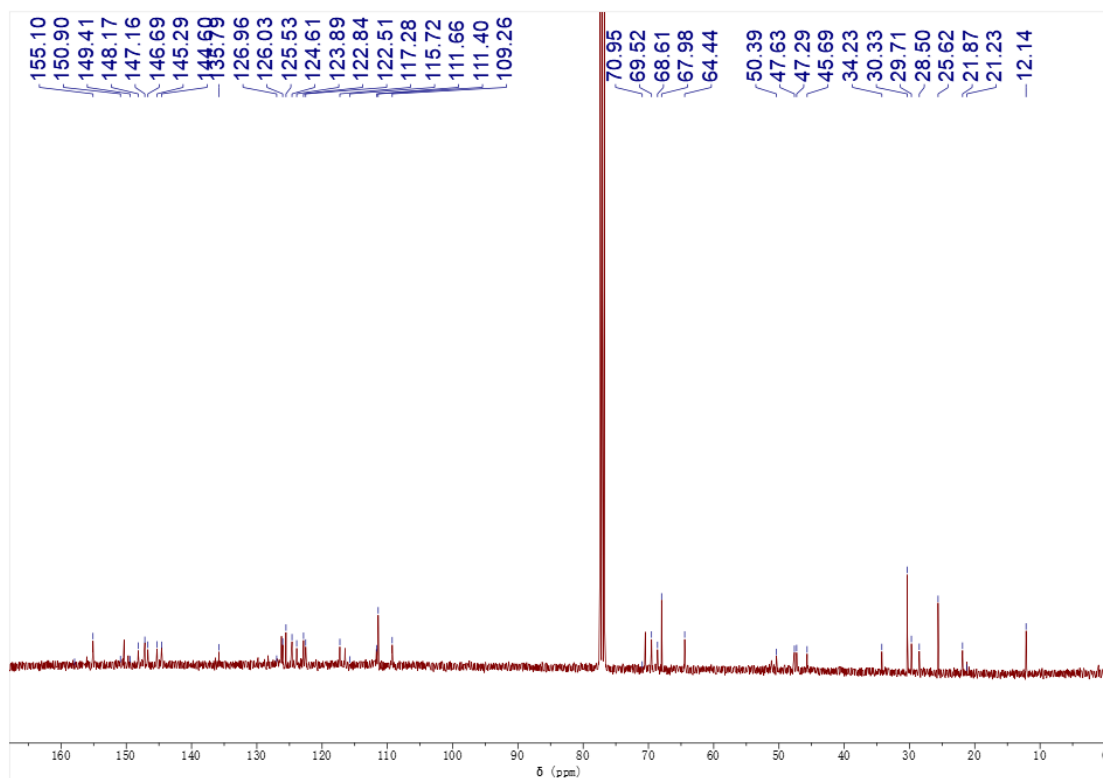

Fig. S11 The  $^{13}\text{C}$  NMR spectrum of P3 in  $\text{CDCl}_3$ .

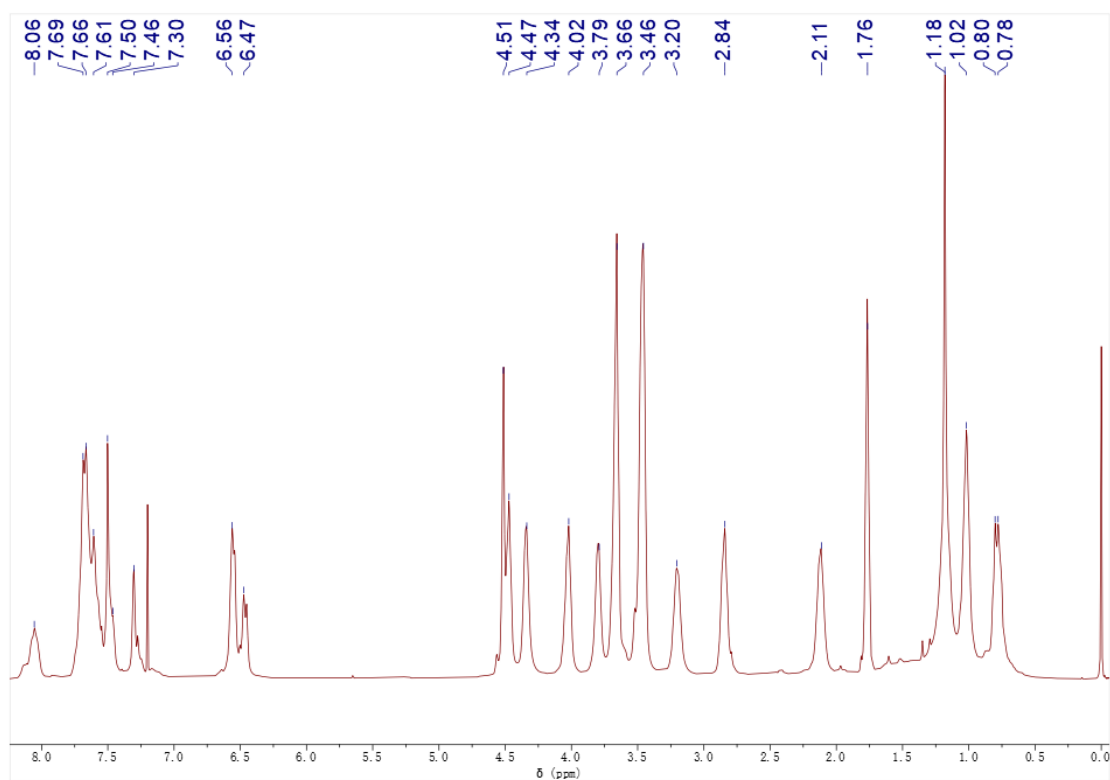

Fig. S12 The  $^1\text{H}$  NMR spectrum of P4 in  $\text{CDCl}_3$ .

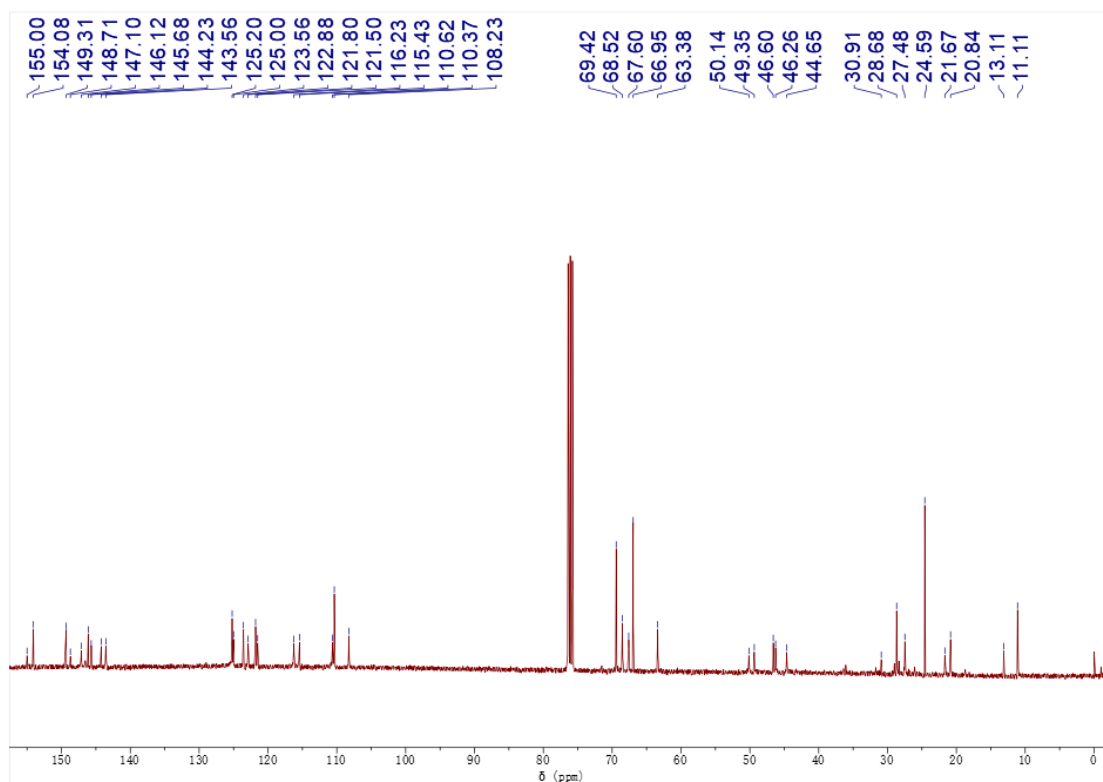

**Fig. S13** The  $^{13}\text{C}$  NMR spectrum of P4 in  $\text{CDCl}_3$ .

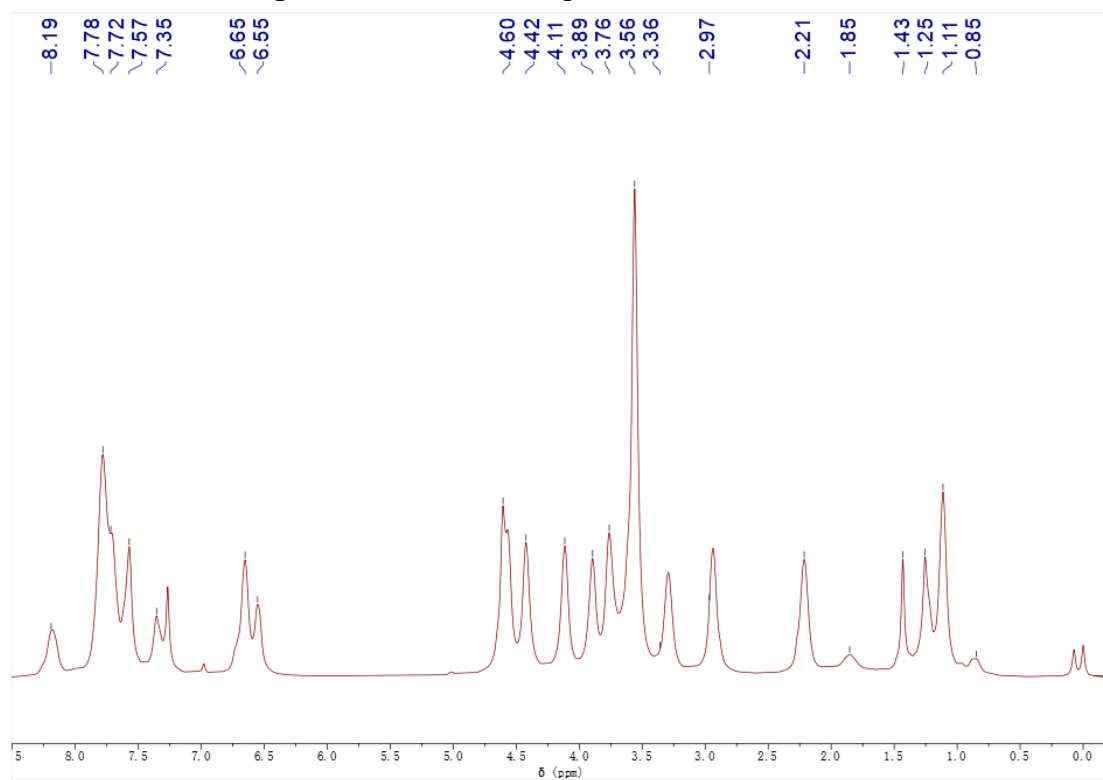

**Fig. S14** The  $^1\text{H}$  NMR spectrum of P5 in  $\text{CDCl}_3$ .

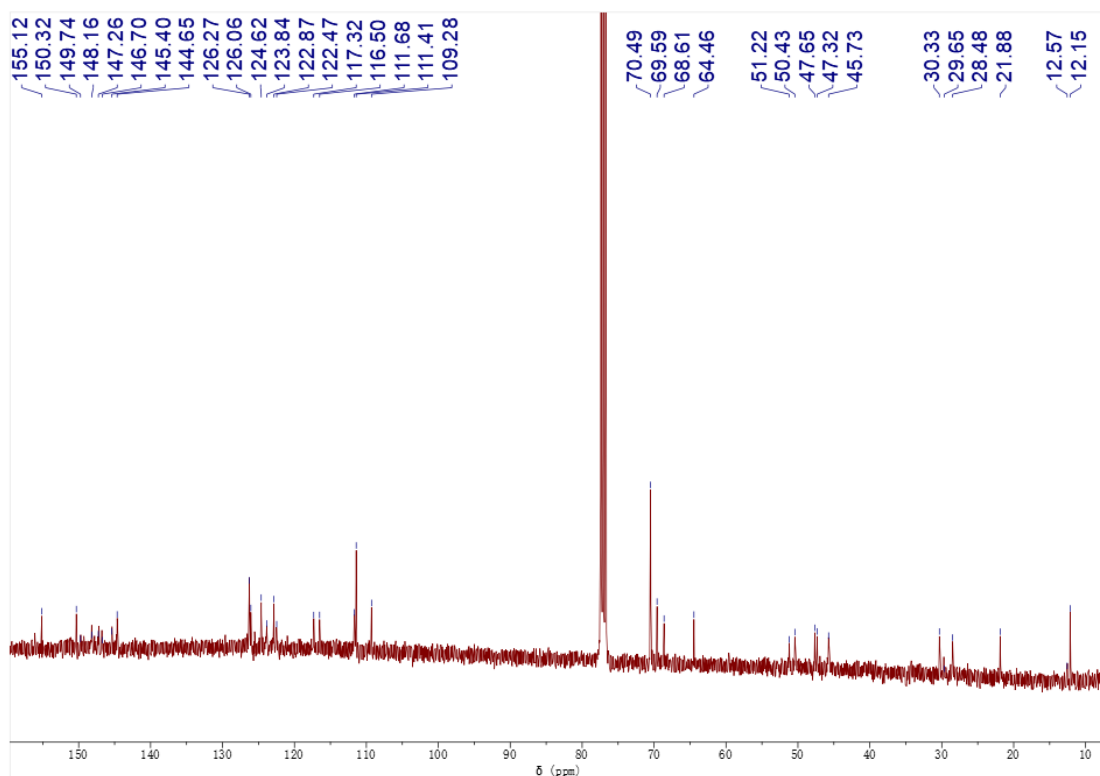

Fig. S15 The  $^{13}\text{C}$  NMR spectrum of **P5** in  $\text{CDCl}_3$ .

## References

- 1 R. Tang, S. Zhou, Z. Cheng, H. Chen, L. Deng, Q. Peng and Z. Li, *CCS Chem.*, 2020, **2**, 1040-1048.
- 2 Z. Li, Z. Li, C. Di, Z. Zhu, Q. Li, Q. Zeng, K. Zhang, Y. Liu, C. Ye and J. Qin, *Macromolecules*, 2006, **39**, 6951-6961.
- 3 Z. Li, Q. Zeng, Z. Li, S. Dong, Z. Zhu, Q. Li, C. Ye, C. Di, Y. Liu and J. Qin, *Macromolecules*, 2006, **39**, 8544-8546.
- 4 Z. Zhu, Q. Li, Q. Zeng, Z. Li, Z. Li, J. Qin, and C. Ye, *Dyes and Pigments*, 2008, **78**, 199-206
- 5 Z. Li, G. Yu, S. Dong, W. Wu, Y. Liu, C. Ye, J. Qin and Z. Li, *Polymer*, 2009, **50**, 2806.
- 6 Z. Li, W. Wu, C. Ye, J. Qin and Z. Li, *J. Phys. Chem. B*, 2009, **113**, 14943-14949.
- 7 Q. Zeng, Z. Li, Z. Li, C. Ye, J. Qin and B. Tang, *Macromolecules*, 2007, **40**, 5634.
- 8 Q. Li, G. Yu, J. Huang, H. Liu, Z. Li, C. Ye, Y. Liu and J. Qin, *Macromol. Rapid Commun.*, 2008, **29**, 798-803.
- 9 Z. Li, P. Hu, G. Yu, W. Zhang, Z. Jiang, Y. Liu, C. Ye, J. Qin and Z. Li, *Phys. Chem. Chem. Phys.*, 2009, **11**, 1220-1226.
- 10 Z. Li, G. Qiu, C. Ye, J. Qin and Z. Li, *Dyes Pigm.*, 2012, **94**, 16.
- 11 Z. Li, W. Wu, G. Yu, Y. Liu, C. Ye, J. Qin and Z. Li, *ACS Appl. Mater. Inter.*, **2009**, **1**, 856.
- 12 W. Wu, Q. Huang, G. Qiu, C. Ye, J. Qin and Z. Li, *J. Mater. Chem.*, 2012, **22**, 18486.

- 13 W. Wu, Q. Huang, C. Zhong, C. Ye, J. Qin, Z. Li, *Polymer.*, 2013, **54**, 5655-5664.
- 14 W. Wu, Q. Huang, G. Qiu, C. Ye, J. Qin and Z. Li, *J. Phys. Chem. C*, 2015, **119**, 14281-14287.
- 15 W. Wu, Cheng Ye, J. Qin and Z. Li, *Chem. Asian J.*, 2013, **8**, 1836 – 1846.
- 16 R. Tang, H. Chen, S. Zhou, B. Liu, D. Gao, H. Zeng and Z. Li, *Polym. Chem.*, 2015, **6**, 6680.
